# Supplementary material for: Oligonucleotides incorporating 8-aza-7-deazapurines: synthesis and base pairing of nucleosides with nitrogen-8 as a glycosylation positionElectronic supplementary information (ESI) available: The molecular weight of oligonucleotides measured by MALDI-TOF. See http://www.rsc.org/suppdata/ob/b3/b301608k/
Source: Royal Society of Chemistry journal article supplement (doi:10.1039/b301608k), 2003-01-01
Supplement: b301608k.doc [file b301608k.doc]

**Table S8** The molecular weight of oligonucleotides measured by MALDI-TOF

| Oligonucleotides | MH+ (calc.) | MH+ (found) |
| --- | --- | --- |
| 5'-d(TAG GTC A**3a**T ACT)-3’(**20**) | 3629 | 3628 |
| 5'-d(TAG GTC A**3b**T ACT)–3’(**21**) | 3680 | 3680 |
| 3'-d(ATC C**3a**G TTA TGA)-5’(**24**) | 3629 | 3629 |
| 3'-d(ATC C**3b**G TTA TGA)-5’(**25**) | 3680 | 3679 |
| 5'-d(TAG GTC **3a3a**T ACT)-3’(**26**) | 3612 | 3614 |
| 3'-d(ATC C**3a**G TT**3a** TGA)-5’(**27**) | 3612 | 3613 |
| 5'-d(TAG GTC AA**6a**T ACT)-3’(**28**) | 3629 | 3631 |
| 3'-d(ATC C**6a**G TTA TGA)-5’(**29**) | 3629 | 3628 |
| 5'-d(TAG GTC A**6b**T ACT)-3’(**30**) | 3680 | 3681 |
| 3'-d(ATC C**6b**G TTA TGA)-5’(**31**) | 3680 | 3680 |
| 5'-d(TAG GTC **6a6a**T ACT)-3’(**32**) | 3612 | 3617 |
| 3'-d(ATC C**6a**G TT**6a** TGA)-5’(**33**) | 3612 | 3613 |
| 5'-d(TAG GTC **6b6b**T ACT)-3’(**34**) | 3714 | 3714 |
| 3'-d(ATC C**6b**G TT**6b** TGA)-5’(**35**) | 3714 | 3714 |
| 5'-d(**3a**TA GGT CAA TAC T)-3’(**36**) | 3942 | 3942 |
| 5'-d(**6a**TA GGT CAA TAC T)-3’(**37**) | 3942 | 3942 |
| 5’-d(**3b**T**3b**T**3b**T**3b**T**3b**T**3b**T)-3’ (**48**) | 3850 | 3850 |
| 5’-d(**6b**T**6b**T**6b**T**6b**T**6b**T**6b**T)-3’ (**49**) | 3850 | 3850 |
